# Supplementary material for: The Conserved Intronic Cleavage and Polyadenylation Site of CstF-77 Gene Imparts Control of 3′ End Processing Activity through Feedback Autoregulation and by U1 snRNP
Source: PubMed Central journal article supplement (PMC3708835; doi:10.1371/journal.pgen.1003613), 2013-07-11

**Figure S4**

**A**

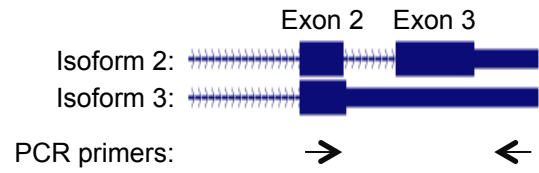

**B**

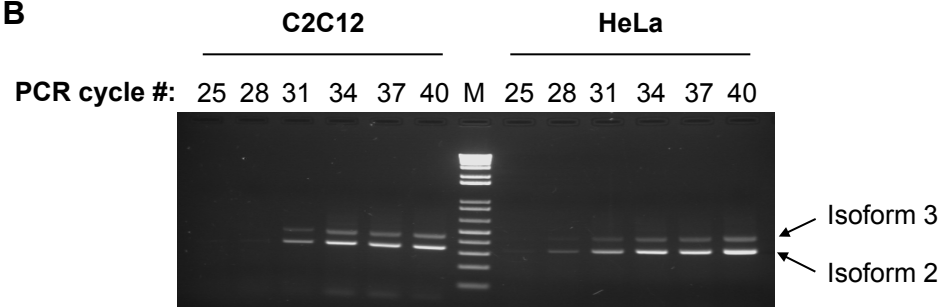

**C**

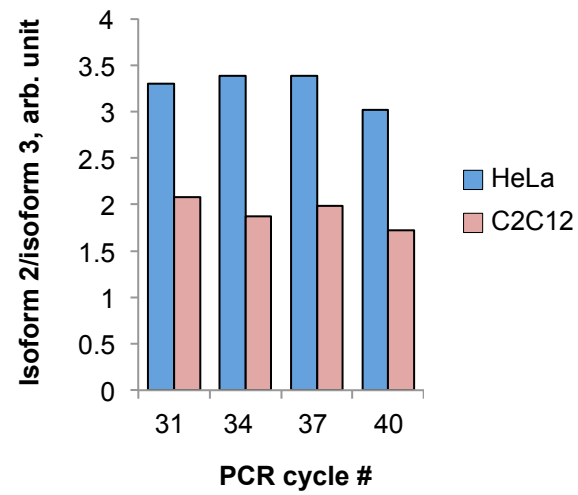

Supplement: pgen.1003613.s004.pdf [file pgen.1003613.s004.pdf]
