# Supplementary material for: The Conserved Intronic Cleavage and Polyadenylation Site of CstF-77 Gene Imparts Control of 3′ End Processing Activity through Feedback Autoregulation and by U1 snRNP
Source: PLOS journal article supplement (doi:10.1371/journal.pgen.1003613), 2013-07-11

Figure S7

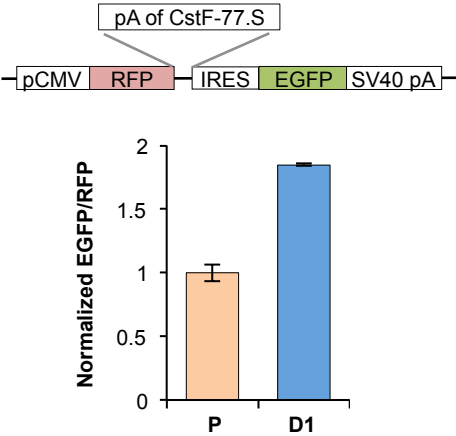

Supplement: S7 (10.1371/journal.pgen.1003613.s007) [file journal.pgen.1003613.s007]
